# Supplementary figures and images for: Magnetic core–shell-structured Fe3O4@CeO2 as an efficient catalyst for catalytic wet peroxide oxidation of benzoic acid
Source: Royal Society of Chemistry journal article supplement (doi:10.1039/c8ra07144f), 2018-01-01

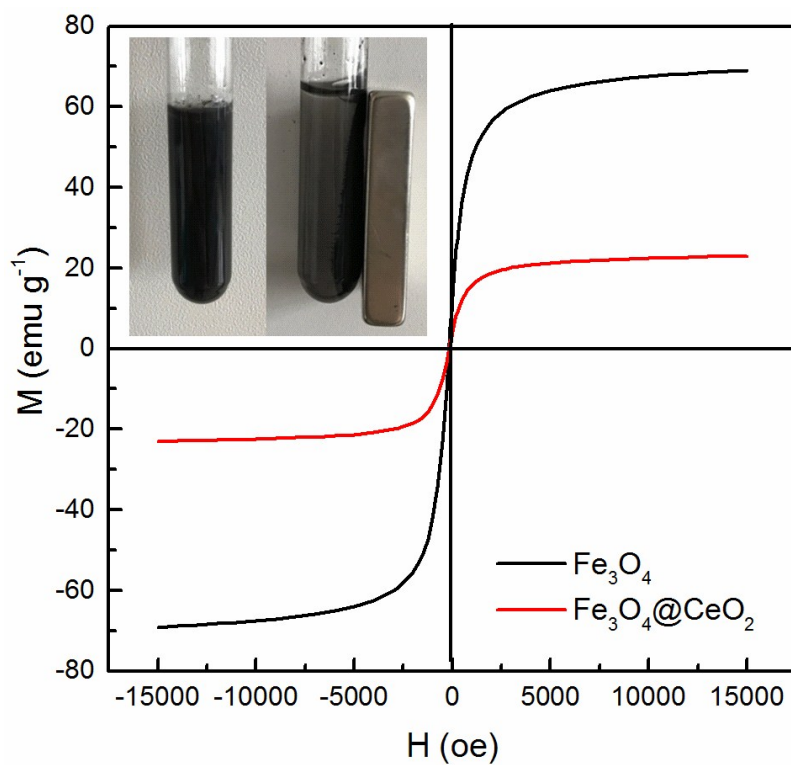

Fig. S1 Magnetization curves of  $\text{Fe}_3\text{O}_4$  and  $\text{Fe}_3\text{O}_4@\text{CeO}_2$  at room temperature.

Supplement: c8ra07144f1.pdf [file c8ra07144f1.pdf]
